# Supplementary material for: Targeting the alternative sigma factor RpoN to combat virulence in Pseudomonas aeruginosa
Source: PubMed Central journal article supplement (PMC5626770; doi:10.1038/s41598-017-12667-y), 2017-10-03
Supplement: 41598_2017_12667_MOESM1_ESM.pdf [file 41598_2017_12667_MOESM1_ESM.pdf]

## Targeting the alternative sigma factor RpoN to combat virulence in *Pseudomonas aeruginosa*

Megan G. Lloyd<sup>1</sup>; Benjamin R. Lundgren<sup>2,3</sup>; Clayton W. Hall<sup>4</sup>; Luke B.-P. Gagnon<sup>4</sup>; Thien-Fah Mah<sup>4</sup>; Jennifer F. Moffat<sup>1</sup>; Christopher T. Nomura<sup>2,3\*</sup>

<sup>1</sup>Department of Microbiology and Immunology, SUNY Upstate Medical University, Syracuse, NY, USA

<sup>2</sup>Department of Chemistry, SUNY College of Environmental Science and Forestry, Syracuse, NY, USA

<sup>3</sup>Center for Applied Microbiology, SUNY College of Environmental Science and Forestry, Syracuse, NY, USA

<sup>4</sup>Department of Biochemistry, Microbiology, and Immunology, University of Ottawa, Ottawa, Ontario, Canada

\* Corresponding author

E-mail: [ctnomura@esf.edu](mailto:ctnomura@esf.edu)

**Supplemental Table 1. Plasmids and Oligonucleotides used in this study.** Abbreviations for antibiotic selection: ampicillin (Am<sup>R</sup>), kanamycin (Km<sup>R</sup>), and gentamicin (Gm<sup>R</sup>). Oligonucleotides (5' to 3') were purchased from Integrated DNA Technologies (Iowa, U.S.A.).

| Plasmids        | Description                                                                                                                            | Source     |
|-----------------|----------------------------------------------------------------------------------------------------------------------------------------|------------|
| pBBR1MCS-5      | Broad-host range cloning vector; Gm <sup>R</sup>                                                                                       | -38        |
| pTrc99a         | General cloning expression vector; Am <sup>R</sup>                                                                                     | Pharmacia  |
| pKH22           | pET-derived expression vector; Am <sup>R</sup>                                                                                         | -39        |
| pJ201:42178     | pUC ori, Km <sup>R</sup> , codon optimized synthetic RpoN region III from <i>A. aerolicus</i>                                          | DNA 2.0    |
| pBRL320         | lacI <sup>Q</sup> -trc promoter of pTrc99a in pBBR1MCS5; Gm <sup>R</sup>                                                               | This study |
| pBRL327         | codon optimized synthetic RpoN region III from <i>A. aerolicus</i> in pKH22; Am <sup>R</sup>                                           | This study |
| pBRL344         | same as pBRL320 but both EcoR I and Sac I restriction sites are absent from the MCS region of cloned pTrc99a fragment; Gm <sup>R</sup> | This study |
| pBRL348         | pBRL344, codon optimized synthetic RpoN region III from <i>A. aerolicus</i>                                                            | This study |
| pBRL349         | pBRL348, Y48A RpoN (synthetic)                                                                                                         | This study |
| Oligonucleotide | Sequence                                                                                                                               |            |
| BL330.f         | cgtacgggtgcccaaggctcgtgagatgctgggtattccg                                                                                               |            |
| BL330.r         | cggaataaccagcatctcagagccttggaaccgtacg                                                                                                  |            |
| BL331.f         | ggaaacagaccatgcaattccagctcgggtaccggggatcc                                                                                              |            |
| BL331.r         | ggatccccgggtaccgagctggaattgcatggtctgtttcc                                                                                              |            |
| BL343.f         | ttaggcctgaatgccggtg                                                                                                                    |            |
| BL343.r         | atgtacgcagtgattgttaccg                                                                                                                 |            |

**Supplemental Table 2. Genes in *Pseudomonas aeruginosa* PAO1 with a 2-fold or greater change in transcription when RpoN\* molecular roadblock is expressed.** Complete data available at GEO accession: GSE35632.

| PA Gene ID: | Gene Name:   | Fold Change |
|-------------|--------------|-------------|
| PA4825      | <i>mtgA</i>  | -88.95477   |
| PA4217      | <i>phzS</i>  | -76.10926   |
| PA4211      | <i>phzB1</i> | -62.90052   |
| PA4823      |              | -59.40452   |
| PA3724      | <i>lasB</i>  | -41.42702   |
| PA4824      |              | -36.69471   |
| PA0200      |              | -33.30115   |
| PA5220      |              | -23.18307   |
| PA1905      | <i>phzG2</i> | -22.12339   |
| PA4129      |              | -21.33276   |
| PA0049      |              | -21.07557   |
| PA5348      |              | -19.39348   |
| PA1901      | <i>phzC2</i> | -18.50701   |
| PA3331      |              | -17.66104   |
| PA2381      |              | -16.91230   |
| PA1903      | <i>phzE2</i> | -16.85378   |
| PA2114      |              | -16.42134   |
| PA4209      | <i>phzM</i>  | -16.11129   |
| PA1904      | <i>phzF2</i> | -15.94464   |
| PA1902      | <i>phzD2</i> | -15.75240   |
| PA4133      |              | -15.69792   |
| PA2570      | <i>pa1L</i>  | -15.69790   |
| PA4130      |              | -14.87688   |
| PA4500      |              | -14.64666   |
| PA1871      | <i>lasA</i>  | -14.44502   |
| PA4131      |              | -13.95297   |
| PA1556      |              | -13.57142   |
| PA5172      | <i>arcB</i>  | -12.66258   |
| PA2939      |              | -12.10474   |
| PA0865      | <i>hpd</i>   | -12.08378   |
| PA1342      |              | -11.83510   |
| PA3334      |              | -11.73300   |
| PA0852      | <i>cpbD</i>  | -11.61165   |
| PA3361      |              | -11.59154   |

|        |              |           |
|--------|--------------|-----------|
| PA4739 |              | -11.37268 |
| PA2445 | <i>gcvP2</i> | -11.08088 |
| PA3187 |              | -10.68489 |
| PA3126 | <i>ibpA</i>  | -10.61108 |
| PA2604 |              | -10.61108 |
| PA3049 | <i>rmf</i>   | -10.28521 |
| PA4141 |              | -9.76419  |
| PA3186 | <i>oprB</i>  | -9.74728  |
| PA3332 |              | -9.64646  |
| PA2112 |              | -9.43159  |
| PA2300 | <i>chiC</i>  | -9.35022  |
| PA0132 |              | -9.33403  |
| PA0122 |              | -9.31787  |
| PA3328 |              | -9.12611  |
| PA2001 | <i>atoB</i>  | -9.00047  |
| PA2008 | <i>fahA</i>  | -8.84584  |
| PA2111 |              | -8.75435  |
| PA2444 | <i>glyA2</i> | -8.72406  |
| PA3333 | <i>fabH2</i> | -8.57418  |
| PA5173 | <i>arcC</i>  | -8.45615  |
| PA2000 | <i>dhcB</i>  | -8.29650  |
| PA3337 | <i>rfaD</i>  | -8.18226  |
| PA2007 | <i>maiA</i>  | -8.00000  |
| PA2247 | <i>bkdA1</i> | -8.00000  |
| PA4822 |              | -7.75431  |
| PA3330 |              | -7.54228  |
| PA4502 |              | -7.46426  |
| PA2248 | <i>bkdA2</i> | -7.45134  |
| PA1555 | <i>ccoP2</i> | -7.36150  |
| PA0546 | <i>metK</i>  | -7.31065  |
| PA1337 | <i>ansB</i>  | -7.29800  |
| PA3190 |              | -7.22251  |
| PA4236 | <i>katA</i>  | -7.22251  |
| PA3329 |              | -7.12307  |
| PA3691 |              | -6.97648  |
| PA2113 | <i>opdO</i>  | -6.86852  |
| PA3335 |              | -6.84476  |
| PA4501 | <i>opdP</i>  | -6.84476  |
| PA4607 |              | -6.78572  |
| PA3922 |              | -6.76224  |
| PA4296 | <i>pprB</i>  | -6.71552  |
| PA1557 | <i>ccoN2</i> | -6.69229  |

|        |             |          |
|--------|-------------|----------|
| PA3569 | <i>mmsB</i> | -6.68070 |
| PA2119 |             | -6.63456 |
| PA3785 |             | -6.62307 |
| PA3327 |             | -6.60016 |
| PA2553 |             | -6.60016 |
| PA0459 |             | -6.53189 |
| PA3923 |             | -6.49802 |
| PA2193 | <i>hcnA</i> | -6.43081 |
| PA4132 |             | -6.40856 |
| PA1914 |             | -6.39746 |
| PA3570 | <i>mmsA</i> | -6.38639 |
| PA3692 | <i>lptF</i> | -6.26581 |
| PA5415 |             | -6.26581 |
| PA3188 |             | -6.25496 |
| PA4306 | <i>flp</i>  | -6.25496 |
| PA1673 |             | -6.07338 |
| PA2069 |             | -6.06287 |
| PA1984 | <i>exaC</i> | -5.98977 |
| PA0587 |             | -5.96904 |
| PA2009 | <i>hmgA</i> | -5.84620 |
| PA5421 | <i>fdhA</i> | -5.84620 |
| PA1999 | <i>dhcA</i> | -5.84620 |
| PA5171 | <i>arcA</i> | -5.66666 |
| PA4206 | <i>mexH</i> | -5.63728 |
| PA4496 |             | -5.51171 |
| PA4587 | <i>ccpR</i> | -5.44526 |
| PA5167 |             | -5.38893 |
| PA2443 | <i>sdaA</i> | -5.36100 |
| PA4205 | <i>mexG</i> | -5.33319 |
| PA5153 |             | -5.32396 |
| PA4134 |             | -5.26889 |
| PA4922 | <i>azu</i>  | -5.26889 |
| PA0266 | <i>gabT</i> | -5.24157 |
| PA4067 | <i>oprG</i> | -5.22344 |
| PA2250 | <i>lpdV</i> | -5.21440 |
| PA3723 |             | -5.18736 |
| PA2110 |             | -5.17838 |
| PA3479 | <i>rhIA</i> | -5.17838 |
| PA2116 |             | -5.13370 |
| PA5054 | <i>hslU</i> | -5.12482 |
| PA0085 | <i>hcp1</i> | -5.10709 |
| PA2194 | <i>hcnB</i> | -5.09824 |

|        |              |          |
|--------|--------------|----------|
| PA1340 |              | -5.06303 |
| PA0588 |              | -5.05426 |
| PA0586 |              | -5.01066 |
| PA4590 | <i>pra</i>   | -4.97605 |
| PA4542 | <i>clpB</i>  | -4.96743 |
| PA2249 | <i>bkdB</i>  | -4.95025 |
| PA3478 | <i>rhlB</i>  | -4.91605 |
| PA1341 |              | -4.89904 |
| PA2573 |              | -4.85678 |
| PA0130 |              | -4.78162 |
| PA3792 | <i>leuA</i>  | -4.74859 |
| PA0139 | <i>ahpC</i>  | -4.71579 |
| PA4210 |              | -4.66701 |
| PA2446 | <i>gcvH2</i> | -4.61075 |
| PA1562 | <i>acnA</i>  | -4.55516 |
| PA1074 | <i>braC</i>  | -4.54727 |
| PA2575 |              | -4.52369 |
| PA2195 | <i>hcnC</i>  | -4.43828 |
| PA2554 |              | -4.41527 |
| PA3622 | <i>rpoS</i>  | -4.41526 |
| PA2552 |              | -4.40762 |
| PA2003 | <i>bdhA</i>  | -4.39999 |
| PA1939 |              | -4.36203 |
| PA0871 | <i>phhB</i>  | -4.36203 |
| PA4714 |              | -4.33941 |
| PA0872 | <i>phhA</i>  | -4.32440 |
| PA4463 |              | -4.32440 |
| PA4880 |              | -4.30944 |
| PA4625 | <i>cdrA</i>  | -4.27226 |
| PA0084 | <i>tssC1</i> | -4.27226 |
| PA0910 |              | -4.23541 |
| PA5427 | <i>adhA</i>  | -4.22075 |
| PA2031 |              | -4.20615 |
| PA5027 |              | -4.18434 |
| PA3477 | <i>rhlR</i>  | -4.16264 |
| PA4761 | <i>dnaK</i>  | -4.15544 |
| PA2805 |              | -4.09823 |
| PA1930 |              | -4.09113 |
| PA3831 | <i>pepA</i>  | -4.07698 |
| PA0870 | <i>phhC</i>  | -4.06992 |
| PA1339 |              | -3.97926 |
| PA5475 |              | -3.97926 |

|        |              |          |
|--------|--------------|----------|
| PA2014 | <i>liuB</i>  | -3.97237 |
| PA0107 |              | -3.95863 |
| PA2513 | <i>antB</i>  | -3.95863 |
| PA1874 |              | -3.93810 |
| PA5369 | <i>pstS</i>  | -3.92448 |
| PA3195 | <i>gapA</i>  | -3.87716 |
| PA3040 |              | -3.87045 |
| PA1789 |              | -3.86375 |
| PA0083 | <i>tssB1</i> | -3.79737 |
| PA1324 |              | -3.78423 |
| PA4352 |              | -3.77768 |
| PA1344 |              | -3.76461 |
| PA2815 |              | -3.73861 |
| PA0905 | <i>rsmA</i>  | -3.73860 |
| PA0269 |              | -3.73213 |
| PA0779 |              | -3.72567 |
| PA4506 | <i>dppF</i>  | -3.72567 |
| PA4503 |              | -3.71278 |
| PA3326 | <i>clpP2</i> | -3.70635 |
| PA3712 |              | -3.66167 |
| PA1323 |              | -3.65533 |
| PA0106 | <i>coxA</i>  | -3.64900 |
| PA0911 |              | -3.64900 |
| PA1596 | <i>htpG</i>  | -3.62379 |
| PA5154 |              | -3.61752 |
| PA3531 | <i>bfrB</i>  | -3.61125 |
| PA3021 |              | -3.59253 |
| PA0300 | <i>spuD</i>  | -3.56771 |
| PA1888 |              | -3.54307 |
| PA0299 | <i>spuC</i>  | -3.49429 |
| PA0745 |              | -3.48220 |
| PA5355 | <i>glcD</i>  | -3.45216 |
| PA0985 | <i>pyoS5</i> | -3.44618 |
| PA2274 |              | -3.43426 |
| PA0315 |              | -3.41054 |
| PA3309 |              | -3.40464 |
| PA2442 | <i>gcvT2</i> | -3.40463 |
| PA3189 |              | -3.39286 |
| PA1135 |              | -3.38698 |
| PA1869 |              | -3.36942 |
| PA5112 | <i>estA</i>  | -3.36942 |
| PA0048 |              | -3.35776 |

|        |               |          |
|--------|---------------|----------|
| PA5053 | <i>hsIV</i>   | -3.34035 |
| PA1041 |               | -3.32303 |
| PA2754 |               | -3.32303 |
| PA2232 | <i>pslB</i>   | -3.29436 |
| PA5178 |               | -3.29436 |
| PA1579 |               | -3.28866 |
| PA3031 |               | -3.27728 |
| PA0050 |               | -3.26594 |
| PA2012 | <i>liuD</i>   | -3.26029 |
| PA2067 |               | -3.24901 |
| PA4611 |               | -3.24338 |
| PA4504 |               | -3.20984 |
| PA5253 | <i>algP</i>   | -3.19873 |
| PA2013 | <i>liuC</i>   | -3.19873 |
| PA4385 | <i>groEL</i>  | -3.18766 |
| PA2753 |               | -3.18215 |
| PA3784 |               | -3.17664 |
| PA4497 |               | -3.15469 |
| PA1338 | <i>ggt</i>    | -3.14923 |
| PA0807 | <i>ampDh3</i> | -3.13834 |
| PA3688 |               | -3.13290 |
| PA4577 |               | -3.12748 |
| PA4876 | <i>osmE</i>   | -3.12206 |
| PA0918 |               | -3.10588 |
| PA4015 |               | -3.10050 |
| PA4738 |               | -3.06843 |
| PA4614 | <i>mscL</i>   | -3.05781 |
| PA1818 | <i>ldcA</i>   | -3.05252 |
| PA0131 |               | -3.05252 |
| PA5352 |               | -3.05252 |
| PA3418 | <i>ldh</i>    | -3.04196 |
| PA0795 | <i>prpC</i>   | -3.04196 |
| PA5100 | <i>hutU</i>   | -3.04196 |
| PA1244 |               | -3.04196 |
| PA2788 |               | -3.02618 |
| PA2015 | <i>liuA</i>   | -3.01049 |
| PA0656 |               | -3.00528 |
| PA4842 |               | -3.00008 |
| PA5546 |               | -2.99488 |
| PA0907 |               | -2.99488 |
| PA1216 |               | -2.98452 |
| PA0542 |               | -2.97936 |



|                    |              |          |
|--------------------|--------------|----------|
| PA0866             | <i>aroP2</i> | -2.97936 |
| PA0265             | <i>gabD</i>  | -2.96905 |
| PA2622             | <i>cspD</i>  | -2.94854 |
| PA4386             | <i>groES</i> | -2.93325 |
| PA0867             | <i>mliC</i>  | -2.93325 |
| PA0298             | <i>spuB</i>  | -2.92817 |
| PA1551             |              | -2.92817 |
| PA0070             | <i>tagQ1</i> | -2.92310 |
| PA5168             |              | -2.92310 |
| PA0836             | <i>ackA</i>  | -2.90291 |
| PA1617             |              | -2.89287 |
| PA3520             |              | -2.89287 |
| ig_517462_518083   |              | -2.86791 |
| PA5397             |              | -2.85799 |
| PA4760             | <i>dnaJ</i>  | -2.84317 |
| PA3572             |              | -2.83825 |
| PA1803             | <i>lon</i>   | -2.82353 |
| PA3041             |              | -2.82353 |
| PA5191             |              | -2.81864 |
| PA4826             |              | -2.80889 |
| PA4026             |              | -2.80403 |
| PA2577             |              | -2.79917 |
| PA5419             | <i>soxG</i>  | -2.79917 |
| PA5181             |              | -2.79433 |
| Pae_tRNA_Arg_s     |              | -2.78949 |
| PA0743             |              | -2.78949 |
| PA1432             | <i>lasI</i>  | -2.78949 |
| PA3182             | <i>pgl</i>   | -2.75108 |
| PA0744             |              | -2.73682 |
| PA5417             | <i>soxD</i>  | -2.72735 |
| PA0473             |              | -2.72263 |
| PA4759             | <i>dapB</i>  | -2.72263 |
| PA1592             |              | -2.71791 |
| PA5418             | <i>soxA</i>  | -2.71321 |
| PA0908             |              | -2.69914 |
| PA0447             | <i>gcdH</i>  | -2.69447 |
| PA1657             |              | -2.69447 |
| PA1493             | <i>cysP</i>  | -2.68050 |
| PA2501             |              | -2.67122 |
| ig_4713795_4713098 |              | -2.66660 |
| PA2197             |              | -2.66198 |
| PA1658             |              | -2.65737 |

|        |              |          |
|--------|--------------|----------|
| PA1784 |              | -2.64818 |
| PA1429 |              | -2.64359 |
| PA1847 |              | -2.64359 |
| PA3417 |              | -2.62989 |
| PA5545 |              | -2.62533 |
| PA3614 |              | -2.62533 |
| PA2915 |              | -2.60720 |
| PA2024 |              | -2.60268 |
| PA1080 | <i>flgE</i>  | -2.59368 |
| PA4525 | <i>pilA</i>  | -2.58023 |
| PA0108 | <i>collI</i> | -2.57576 |
| PA0808 |              | -2.56241 |
| PA4733 | <i>acsB</i>  | -2.56241 |
| PA1546 | <i>hemN</i>  | -2.55797 |
| PA3042 |              | -2.54471 |
| PA2433 |              | -2.54030 |
| PA3336 |              | -2.54030 |
| PA4328 |              | -2.51403 |
| PA2698 |              | -2.51403 |
| PA4608 |              | -2.51403 |
| PA5312 |              | -2.50533 |
| PA3832 | <i>holC</i>  | -2.50533 |
| PA4874 |              | -2.49666 |
| PA4762 | <i>grpE</i>  | -2.49666 |
| PA1677 |              | -2.49234 |
| PA3666 | <i>dapD</i>  | -2.48802 |
| PA0195 | <i>pntA</i>  | -2.48372 |
| PA4648 |              | -2.48372 |
| PA3236 |              | -2.47941 |
| PA0746 |              | -2.47512 |
| PA1174 | <i>napA</i>  | -2.46656 |
| PA4139 |              | -2.45803 |
| PA0301 | <i>spuE</i>  | -2.45377 |
| PA5119 | <i>glnA</i>  | -2.44105 |
| PA3972 |              | -2.43682 |
| PA5208 |              | -2.43260 |
| PA0302 | <i>spuF</i>  | -2.41580 |
| PA0038 |              | -2.40327 |
| PA4207 | <i>mexI</i>  | -2.39911 |
| PA4208 | <i>ompD</i>  | -2.39496 |
| PA5245 |              | -2.39496 |
| PA3613 |              | -2.39081 |

|        |              |          |
|--------|--------------|----------|
| PA2177 |              | -2.37841 |
| PA0467 |              | -2.37430 |
| PA4498 |              | -2.37430 |
| PA2760 | <i>oprQ</i>  | -2.37430 |
| PA5528 |              | -2.37019 |
| PA3753 |              | -2.36608 |
| PA0506 |              | -2.35790 |
| PA2512 | <i>antA</i>  | -2.35790 |
| PA1967 |              | -2.35790 |
| PA1196 |              | -2.34974 |
| PA2071 | <i>fusA2</i> | -2.34161 |
| PA3250 |              | -2.33351 |
| PA5366 | <i>pstB</i>  | -2.31739 |
| PA4311 |              | -2.30537 |
| PA0304 | <i>spuH</i>  | -2.30138 |
| PA5360 | <i>phoB</i>  | -2.30138 |
| PA2066 |              | -2.29740 |
| PA4624 | <i>cdrB</i>  | -2.29342 |
| PA1288 |              | -2.28548 |
| PA3931 |              | -2.28153 |
| PA3385 | <i>amrZ</i>  | -2.27758 |
| PA4031 | <i>ppa</i>   | -2.27758 |
| PA0250 |              | -2.27363 |
| PA0634 |              | -2.26970 |
| PA0854 | <i>fumC2</i> | -2.26577 |
| PA2562 |              | -2.26577 |
| PA3879 | <i>narL</i>  | -2.25793 |
| PA0547 |              | -2.25402 |
| PA1094 | <i>fliD</i>  | -2.25012 |
| PA0622 |              | -2.24622 |
| PA0960 |              | -2.24622 |
| PA5219 |              | -2.24233 |
| PA0615 |              | -2.24233 |
| PA4651 |              | -2.23845 |
| PA2223 |              | -2.23845 |
| PA3819 |              | -2.23071 |
| PA5396 |              | -2.20381 |
| PA4505 |              | -2.19999 |
| PA1544 | <i>anr</i>   | -2.19619 |
| PA5098 | <i>hutH</i>  | -2.19619 |
| PA0090 | <i>clpV1</i> | -2.18859 |
| PA4204 | <i>ppgL</i>  | -2.18859 |

|        |             |          |
|--------|-------------|----------|
| PA3501 |             | -2.18102 |
| PA2068 |             | -2.16971 |
| PA1940 |             | -2.16971 |
| PA1071 | <i>braF</i> | -2.16595 |
| PA5313 |             | -2.15846 |
| PA1604 |             | -2.15846 |
| PA0176 | <i>aer2</i> | -2.15099 |
| PA0114 | <i>senC</i> | -2.15099 |
| PA5380 | <i>gbdR</i> | -2.15099 |
| PA4610 |             | -2.13984 |
| PA5314 |             | -2.13613 |
| PA0624 |             | -2.12874 |
| PA2365 |             | -2.12506 |
| PA2030 |             | -2.12138 |
| PA1746 |             | -2.11770 |
| PA2826 |             | -2.10672 |
| PA3415 |             | -2.09943 |
| PA1571 |             | -2.09943 |
| PA5169 |             | -2.09580 |
| PA2378 |             | -2.09217 |
| PA5543 |             | -2.09217 |
| PA0140 | <i>ahpF</i> | -2.08855 |
| PA2555 |             | -2.08493 |
| PA5354 | <i>glcE</i> | -2.08132 |
| PA1327 |             | -2.08132 |
| PA4735 |             | -2.08132 |
| PA0626 |             | -2.08132 |
| PA0446 |             | -2.07772 |
| PA4175 | <i>piv</i>  | -2.07412 |
| PA3848 |             | -2.07412 |
| PA5271 |             | -2.07412 |
| PA3529 |             | -2.06337 |
| PA0815 |             | -2.06337 |
| PA1217 |             | -2.06337 |
| PA3181 |             | -2.06337 |
| PA0835 | <i>pta</i>  | -2.05623 |
| PA4913 |             | -2.05623 |
| PA0201 |             | -2.05267 |
| PA0126 |             | -2.04911 |
| PA0853 |             | -2.04911 |
| PA0423 | <i>pasP</i> | -2.04557 |
| PA3615 |             | -2.04557 |

|                    |              |          |
|--------------------|--------------|----------|
| PA0111             |              | -2.04202 |
| PA5060             | <i>phaF</i>  | -2.04202 |
| PA2620             | <i>clpA</i>  | -2.03849 |
| PA5364             |              | -2.03496 |
| PA1941             |              | -2.03144 |
| PA2776             |              | -2.02792 |
| PA0962             |              | -2.02441 |
| PA1073             | <i>braD</i>  | -2.02090 |
| PA5372             | <i>betA</i>  | -2.02090 |
| PA0637             |              | -2.01391 |
| PA1880             |              | -2.01391 |
| PA1326             | <i>ilvA2</i> | -2.00694 |
| PA5058             | <i>phaC2</i> | -2.00694 |
| PA3440             |              | -2.00347 |
| PA3014             | <i>faoA</i>  | -2.00347 |
| PA1777             | <i>oprF</i>  | -2.00000 |
| PA1564             |              | 2.00000  |
| PA3806             |              | 2.00000  |
| PA3242             |              | 2.00347  |
| PA2742             | <i>rpml</i>  | 2.01740  |
| PA3979             |              | 2.01740  |
| PA5216             |              | 2.01740  |
| PA1195             |              | 2.02441  |
| PA2020             |              | 2.02441  |
| PA2950             |              | 2.02792  |
| PA1776             | <i>sigX</i>  | 2.02792  |
| PA4664             | <i>hemK</i>  | 2.02792  |
| PA1800             | <i>tig</i>   | 2.03144  |
| PA3169             | <i>mtnA</i>  | 2.03849  |
| ig_6125795_6125079 |              | 2.04202  |
| Pae_tRNA_Trp_f     |              | 2.04202  |
| PA4051             | <i>thiL</i>  | 2.04557  |
| PA3646             | <i>lpxD</i>  | 2.04557  |
| PA4450             | <i>murA</i>  | 2.05623  |
| PA5117             | <i>typA</i>  | 2.05979  |
| PA0922             |              | 2.05980  |
| PA3211             |              | 2.06337  |
| PA0802             |              | 2.06337  |
| PA3983             |              | 2.06337  |
| PA4007             | <i>proA</i>  | 2.06694  |
| PA2772             |              | 2.06695  |
| PA4566             | <i>obg</i>   | 2.06695  |

|                    |             |         |
|--------------------|-------------|---------|
| PA1037             |             | 2.07053 |
| PA1965             |             | 2.07053 |
| PA5414             |             | 2.07772 |
| PA2384             |             | 2.08493 |
| PA5336             | <i>gmk</i>  | 2.08855 |
| PA0966             | <i>ruvA</i> | 2.08855 |
| PA4003             | <i>pbpA</i> | 2.09943 |
| PA1714             | <i>exsD</i> | 2.09943 |
| PA1716             | <i>pscC</i> | 2.11038 |
| PA4050             | <i>pgpA</i> | 2.11038 |
| PA3657             | <i>map</i>  | 2.11038 |
| PA0168             |             | 2.11770 |
| PA2733             |             | 2.11770 |
| PA1044             |             | 2.12138 |
| PA5503             |             | 2.12874 |
| PA3654             | <i>pyrH</i> | 2.13243 |
| PA1199             |             | 2.13243 |
| PA1964             |             | 2.13243 |
| PA5563             | <i>soj</i>  | 2.13613 |
| ig_3545880_3545073 |             | 2.13613 |
| PA5332             | <i>crc</i>  | 2.13613 |
| PA0595             | <i>ostA</i> | 2.13984 |
| PA0608             |             | 2.14355 |
| PA1457             | <i>cheZ</i> | 2.14726 |
| PA1741             |             | 2.14726 |
| PA3981             |             | 2.14726 |
| PA4482             | <i>gatC</i> | 2.14726 |
| PA5560             | <i>atpB</i> | 2.14726 |
| PA3828             |             | 2.15099 |
| PA4782             |             | 2.15099 |
| PA0968             |             | 2.15846 |
| PA1452             | <i>flhA</i> | 2.16220 |
| PA1712             | <i>exsB</i> | 2.17347 |
| PA5465             |             | 2.17347 |
| PA0017             |             | 2.18102 |
| PA2741             | <i>rplT</i> | 2.18102 |
| PA2860             |             | 2.18102 |
| PA0805             |             | 2.18480 |
| PA0668             | <i>tyrZ</i> | 2.18859 |
| PA3129             |             | 2.20381 |
| PA0068             |             | 2.20763 |
| PA1305             |             | 2.21146 |

|                      |              |         |
|----------------------|--------------|---------|
| PA3903               | <i>prfC</i>  | 2.21146 |
| PA5002               |              | 2.21530 |
| PA4846               | <i>aroQ1</i> | 2.22299 |
| PA3881               |              | 2.22299 |
| PA0733               |              | 2.22299 |
| PA4698               |              | 2.22684 |
| PA1117               |              | 2.22684 |
| PA1453               | <i>flhF</i>  | 2.23071 |
| PA3109               |              | 2.23071 |
| PA3110               |              | 2.23845 |
| PA4226               | <i>pchE</i>  | 2.24622 |
| ig_2558918_2557964_s |              | 2.25012 |
| PA0659               |              | 2.25402 |
| PA5001               |              | 2.25793 |
| PA2774               |              | 2.26184 |
| PA1722               | <i>pscl</i>  | 2.26577 |
| PA4765               | <i>omlA</i>  | 2.26577 |
| PA0729               |              | 2.26970 |
| PA2453               |              | 2.27758 |
| PA4847               | <i>accB</i>  | 2.27758 |
| PA0723               | <i>coaB</i>  | 2.28548 |
| PA2975               | <i>rluC</i>  | 2.29342 |
| PA4267               | <i>rpsG</i>  | 2.29740 |
| PA3650               | <i>dxr</i>   | 2.29740 |
| PA1394               |              | 2.30537 |
| PA0965               | <i>ruvC</i>  | 2.30537 |
| Pae_tRNA_Ala_f       |              | 2.31338 |
| PA1200               |              | 2.31338 |
| PA5274               | <i>rnk</i>   | 2.31739 |
| PA2969               | <i>plsX</i>  | 2.32543 |
| PA1475               | <i>ccmA</i>  | 2.32947 |
| PA3815               | <i>iscR</i>  | 2.33351 |
| PA4996               | <i>rfaE</i>  | 2.34161 |
| PA4852               |              | 2.34161 |
| PA3620               | <i>mutS</i>  | 2.34161 |
| PA0592               | <i>ksgA</i>  | 2.34567 |
| PA5338               | <i>spoT</i>  | 2.37019 |
| PA3741               |              | 2.37430 |
| PA3807               | <i>ndk</i>   | 2.38254 |
| PA1098               | <i>fleS</i>  | 2.38254 |
| PA4116               | <i>bphO</i>  | 2.39081 |
| PA5504               |              | 2.39081 |

|                    |              |         |
|--------------------|--------------|---------|
| PA4135             |              | 2.39496 |
| PA4266             | <i>fusA1</i> | 2.39496 |
| Pae_tRNA_Leu_s     |              | 2.39496 |
| PA1100             | <i>fliE</i>  | 2.40327 |
| PA4479             | <i>mreD</i>  | 2.40327 |
| PA4997             | <i>msbA</i>  | 2.40744 |
| PA5564             | <i>gidB</i>  | 2.41580 |
| PA4449             | <i>hisG</i>  | 2.41999 |
| PA1582             | <i>sdhD</i>  | 2.42419 |
| PA3719             | <i>armR</i>  | 2.43260 |
| PA3111             | <i>folC</i>  | 2.43260 |
| PA4379             |              | 2.43682 |
| PA1773             | <i>cmaX</i>  | 2.43682 |
| PA3009             |              | 2.43682 |
| PA4271             | <i>rplL</i>  | 2.45377 |
| PA1192             |              | 2.46229 |
| PA2679             |              | 2.47084 |
| PA0719             |              | 2.48802 |
| PA4700             | <i>mrcB</i>  | 2.49234 |
| PA3578             |              | 2.49666 |
| PA4238             | <i>rpoA</i>  | 2.49666 |
| PA4043             | <i>ispA</i>  | 2.49666 |
| PA4635             |              | 2.50967 |
| PA2629             | <i>purB</i>  | 2.51839 |
| PA4481             | <i>mreB</i>  | 2.52275 |
| PA5445             |              | 2.52276 |
| PA4629             |              | 2.53590 |
| ig_3527428_3526677 |              | 2.54912 |
| PA4006             | <i>nadD</i>  | 2.55797 |
| PA3144             |              | 2.55797 |
| PA3655             | <i>tsf</i>   | 2.56685 |
| Pae_tRNA_Gln_s     |              | 2.57130 |
| PA3152             | <i>hisH2</i> | 2.57130 |
| ig_1117390_1118158 |              | 2.58023 |
| PA3151             | <i>hisF2</i> | 2.58470 |
| PA4636             |              | 2.58919 |
| PA3142             |              | 2.58919 |
| PA4004             |              | 2.59368 |
| PA2973             |              | 2.59818 |
| PA2288             |              | 2.60268 |
| PA4323             |              | 2.60268 |
| PA3266             | <i>capB</i>  | 2.60268 |



|                |             |         |
|----------------|-------------|---------|
| PA1812         | <i>mltD</i> | 2.60268 |
| PA4237         | <i>rplQ</i> | 2.60720 |
| PA1031         |             | 2.61172 |
| PA4255         | <i>rpmC</i> | 2.61625 |
| PA5337         | <i>rpoZ</i> | 2.62988 |
| PA0722         |             | 2.62989 |
| PA3178         |             | 2.63902 |
| PA5565         | <i>gidA</i> | 2.65277 |
| PA1610         | <i>fabA</i> | 2.65737 |
| PA1711         | <i>exsE</i> | 2.65737 |
| PA3148         | <i>wbpl</i> | 2.66198 |
| PA4480         | <i>mreC</i> | 2.66198 |
| PA4671         |             | 2.67122 |
| PA2967         | <i>fabG</i> | 2.68050 |
| PA1317         | <i>cyoA</i> | 2.70851 |
| PA4251         | <i>rplE</i> | 2.70851 |
| PA3577         |             | 2.74157 |
| PA4853         | <i>fis</i>  | 2.75108 |
| PA5174         |             | 2.76542 |
| PA4672         |             | 2.77984 |
| PA4810         | <i>fdnI</i> | 2.77984 |
| PA3162         | <i>rpsA</i> | 2.77984 |
| PA1581         | <i>sdhC</i> | 2.80403 |
| PA4742         | <i>truB</i> | 2.80403 |
| PA4325         |             | 2.80889 |
| PA4069         |             | 2.83825 |
| PA4239         | <i>rpsD</i> | 2.84317 |
| PA3154         | <i>wzy</i>  | 2.86295 |
| PA4745         | <i>nusA</i> | 2.86295 |
| Pae_tRNA_Phe_f |             | 2.86295 |
| PA2460         |             | 2.88286 |
| PA4665         | <i>prfA</i> | 2.88786 |
| PA0718         |             | 2.90291 |
| PA4250         | <i>rpsN</i> | 2.90291 |
| PA0128         |             | 2.91804 |
| PA4240         | <i>rpsK</i> | 2.93834 |
| PA4743         | <i>rbfA</i> | 2.94854 |
| PA4662         | <i>murI</i> | 2.96391 |
| PA2974         |             | 2.96905 |
| PA5340         |             | 2.98452 |
| PA4247         | <i>rplR</i> | 2.98970 |
| PA3179         |             | 2.99488 |

|                    |             |         |
|--------------------|-------------|---------|
| PA4451             |             | 2.99488 |
| Pae_tRNA_Ile_f     |             | 3.00528 |
| PA3644             | <i>lpxA</i> | 3.02095 |
| PA3353             |             | 3.02618 |
| PA4748             | <i>tpiA</i> | 3.04196 |
| PA3145             | <i>wbpL</i> | 3.05252 |
| PA4115             |             | 3.06312 |
| PA4042             | <i>xseB</i> | 3.06843 |
| PA4567             | <i>rpmA</i> | 3.07375 |
| PA5118             | <i>thil</i> | 3.08977 |
| PA0354             |             | 3.09513 |
| PA4640             | <i>mgoB</i> | 3.12206 |
| PA3645             | <i>fabZ</i> | 3.17664 |
| PA4268             | <i>rpsL</i> | 3.17664 |
| PA1775             | <i>cmpX</i> | 3.18215 |
| PA1281             | <i>cobV</i> | 3.18215 |
| PA3526             |             | 3.19319 |
| PA3616             |             | 3.22098 |
| PA5561             | <i>atpI</i> | 3.23216 |
| PA3643             | <i>lpxB</i> | 3.23216 |
| PA1240             |             | 3.24338 |
| PA3656             | <i>rpsB</i> | 3.24901 |
| PA1105             | <i>fliJ</i> | 3.26029 |
| PA4568             | <i>rplU</i> | 3.26594 |
| PA3818             |             | 3.30008 |
| PA4940             |             | 3.32303 |
| PA4241             | <i>rpsM</i> | 3.32303 |
| PA1852             |             | 3.34615 |
| PA4256             | <i>rplP</i> | 3.35776 |
| PA4258             | <i>rplV</i> | 3.36359 |
| PA5339             |             | 3.38112 |
| PA4741             | <i>rpsO</i> | 3.38698 |
| PA4248             | <i>rplF</i> | 3.38698 |
| ig_1947041_1948502 |             | 3.39285 |
| PA2019             |             | 3.39285 |
| PA5570             | <i>rpmH</i> | 3.39874 |
| PA4274             | <i>rplK</i> | 3.43426 |
| PA4275             | <i>nusG</i> | 3.47016 |
| PA4260             | <i>rplB</i> | 3.47617 |
| PA2968             | <i>fabD</i> | 3.47617 |
| PA4244             | <i>rplO</i> | 3.50642 |
| PA2840             |             | 3.51250 |

|                    |             |         |
|--------------------|-------------|---------|
| PA4259             | <i>rpsS</i> | 3.56772 |
| PA4254             | <i>rpsQ</i> | 3.57390 |
| PA4252             | <i>rplX</i> | 3.58010 |
| PA4253             | <i>rplN</i> | 3.59876 |
| PA4242             | <i>rpmJ</i> | 3.64900 |
| PA4243             | <i>secY</i> | 3.65533 |
| PA5049             | <i>rpmE</i> | 3.65533 |
| PA1639             |             | 3.67438 |
| PA4932             | <i>rplI</i> | 3.69994 |
| PA0577             | <i>dnaG</i> | 3.69994 |
| PA4245             | <i>rpmD</i> | 3.70635 |
| PA4273             | <i>rplA</i> | 3.70635 |
| PA3246             | <i>rluA</i> | 3.74509 |
| ig_5207621_5208463 |             | 3.79079 |
| PA4220             |             | 3.80395 |
| PA4249             | <i>rpsH</i> | 3.81055 |
| PA4670             | <i>prs</i>  | 3.81055 |
| PA4246             | <i>rpsE</i> | 3.82378 |
| PA4934             | <i>rpsR</i> | 3.84371 |
| Pae_tRNA_Gly_s     |             | 4.02085 |
| PA4276             | <i>secE</i> | 4.02085 |
| PA4433             | <i>rplM</i> | 4.03481 |
| PA5569             | <i>rnpA</i> | 4.04881 |
| PA3149             | <i>wbpH</i> | 4.07698 |
| PA4432             | <i>rpsI</i> | 4.08405 |
| PA0758             |             | 4.08405 |
| PA4257             | <i>rpsC</i> | 4.11246 |
| Pae_tRNA_Tyr_s     |             | 4.12673 |
| PA3982             |             | 4.14106 |
| PA4746             |             | 4.18434 |
| PA2971             |             | 4.19887 |
| PA4935             | <i>rpsF</i> | 4.21344 |
| PA4753             |             | 4.21344 |
| PA5315             | <i>rpmG</i> | 4.22807 |
| PA2970             | <i>rpmF</i> | 4.53153 |
| PA3146             | <i>wbpK</i> | 4.57097 |
| PA3745             | <i>rpsP</i> | 4.66701 |
| PA4933             |             | 4.91605 |
| PA4272             | <i>rplJ</i> | 5.04551 |
| PA0579             | <i>rpsU</i> | 5.07181 |
| PA3744             | <i>rimM</i> | 5.10708 |
| PA4263             | <i>rplC</i> | 5.11594 |

|        |             |          |
|--------|-------------|----------|
| PA3742 | <i>rplS</i> | 5.14261  |
| PA4563 | <i>rpsT</i> | 5.15153  |
| PA0578 |             | 5.17838  |
| PA2584 | <i>pgsA</i> | 5.24157  |
| PA4262 | <i>rplD</i> | 5.36099  |
| PA4261 | <i>rplW</i> | 5.37029  |
| PA5568 |             | 5.52127  |
| PA4264 | <i>rpsJ</i> | 5.68633  |
| PA5316 | <i>rpmB</i> | 5.94839  |
| PA5471 |             | 6.15816  |
| PA3743 | <i>trmD</i> | 6.43081  |
| PA3147 | <i>wbpJ</i> | 6.48677  |
| PA3642 | <i>rnhB</i> | 6.58873  |
| PA5470 |             | 6.86852  |
| PA0734 |             | 8.05564  |
| PA1718 | <i>pscE</i> | 13.61854 |

**Supplementary Table S3. List of genes affected by loss of native RpoN or expression of RpoN\* in *Pseudomonas aeruginosa*.** Select genes with altered transcription. Comparisons include: *P. aeruginosa* PAO1 and the *P. aeruginosa*  $\Delta$ rpoN strain each harboring the empty vector plasmid (E.V.); and *P. aeruginosa*  $\Delta$ rpoN strain with the empty vector plasmid and  $\Delta$ rpoN strain expressing RpoN\*. *P. aeruginosa* PAO1 grown in LB broth, and *P. aeruginosa*  $\Delta$ rpoN grown in LB broth supplemented with 1 mM glutamine. Mark “---” indicates no change in transcription.

| Regulator         | Gene ID       | Function                                                    | PAO1 - EV<br>v.<br>$\Delta$ RpoN - EV | $\Delta$ RpoN - EV<br>v.<br>$\Delta$ RpoN - RpoN* |
|-------------------|---------------|-------------------------------------------------------------|---------------------------------------|---------------------------------------------------|
| RpoN              | PA2445        | Glycine cleavage system protein P2                          | -15.6                                 | ---                                               |
| RpoN, Fecl        | PA1342        | Amino acid transport                                        | -11.0                                 | -2.9                                              |
| RpoN              | PA1094        | <i>fliD</i> , flagellar capping protein                     | -10.3                                 | ---                                               |
| RpoN, AlgU        | PA3692        | <i>lptF</i> , lipotoxon F                                   | -9.0                                  | ---                                               |
| RpoN              | PA2604        | Conserved hypothetical protein, localized to membrane       | -6.7                                  | -2.1                                              |
| RpoN              | PA2446        | Glycine cleavage system protein H2                          | -5.3                                  | ---                                               |
| RpoN (RpoD)       | PA4463        | Conserved hypothetical protein, localized to cytoplasm      | -4.5                                  | -2.7                                              |
| RpoN (RpoD)       | PA4590        | <i>pra</i> , protein activator                              | -4.3                                  | ---                                               |
| RpoN              | PA5119        | <i>glnA</i> , glutamine synthetase                          | -3.0                                  | -1.4                                              |
| RpoN              | PA4726        | <i>cbrB</i> , two-component response regulator              | ---                                   | -1.4                                              |
| RpoN              | PA2740        | <i>pheS</i> , phenylalanyl-tRNA ligase subunit alpha        | ---                                   | -2.0                                              |
| <b>RpoN, RpoS</b> | <b>PA3477</b> | <b><i>rhIR</i>, transcriptional regulator</b>               | <b>---</b>                            | <b>-2.8</b>                                       |
| RhIR              | PA4217        | <i>phzS</i> , flavin-containing monooxygenase               | -43.0                                 | -1.6                                              |
|                   | PA3724        | <i>lasB</i> , elastase                                      | -13.9                                 | -3.2                                              |
|                   | PA1871        | <i>lasA</i> , elastase                                      | -10.7                                 | -1.3                                              |
|                   | PA2009        | <i>hmgA</i> , homogentisate 1,2-dioxygenase                 | -10.5                                 | -2.3                                              |
|                   | PA4211        | <i>phzB1</i> , probable phenazine biosynthesis protein      | -10.4                                 | -9.2                                              |
|                   | PA4209        | <i>phzM</i> , probable phenazine-specific methyltransferase | -7.9                                  | -1.5                                              |
|                   | PA1901        | <i>phzC2</i> , phenazine biosynthesis protein               | -7.7                                  | -3.2                                              |
|                   | PA4296        | <i>pprB</i> , biofilm regulator                             | -6.1                                  | -1.3                                              |
|                   | PA0852        | <i>cbpD</i> , chitin-binding protein                        | -5.5                                  | -1.1                                              |
|                   | PA1902        | <i>phzD2</i> , phenazine biosynthesis protein               | -5.0                                  | -2.8                                              |
|                   | PA1903        | <i>phzE2</i> , phenazine biosynthesis protein               | -4.7                                  | -4.1                                              |
|                   | PA1905        | <i>phzG2</i> , probable pyridoxamine 5'-phosphate oxidase   | -4.5                                  | -4.9                                              |
|                   | PA1904        | <i>phzF2</i> , probable phenazine biosynthesis protein      | -4.0                                  | -4.0                                              |
|                   | PA2193        | <i>hcnA</i> , hydrogen cyanide synthase                     | -3.3                                  | -1.9                                              |
|                   | PA1596        | <i>htpG</i> , heat shock protein                            | -3.3                                  | -1.3                                              |
|                   | PA3478        | <i>rhIB</i> , rhamnosyltransferase chain B                  | -3.1                                  | -1.4                                              |
|                   | PA2194        | <i>hcnB</i> , hydrogen cyanide synthase                     | -2.7                                  | -1.8                                              |
|                   | PA2195        | <i>hcnC</i> , hydrogen cyanide synthase                     | -2.3                                  | -1.6                                              |
| <b>RpoN</b>       | <b>PA1544</b> | <b><i>anr</i>, transcriptional regulator</b>                | <b>---</b>                            | <b>-2.1</b>                                       |
| Anr               | PA5172        | <i>arcB</i> , arginine metabolism                           | -20.6                                 | -1.7                                              |
|                   | PA5171        | <i>arcA</i> , arginine metabolism                           | -12.4                                 | -1.8                                              |
|                   | PA5170        | <i>arcD</i> , arginine metabolism                           | -10.1                                 | -2.3                                              |

|             |               |                                                  |            |             |
|-------------|---------------|--------------------------------------------------|------------|-------------|
|             | PA3337        | <i>rfaD</i> , LPS-core related                   | -8.8       | -1.4        |
|             | PA4067        | <i>oprG</i> , outer membrane protein             | -7.2       | -3.4        |
|             | PA1557        | <i>ccoN2</i> , cytochrome c oxidase              | -5.2       | -1.5        |
|             | PA0459        | ClpA/B protease ATP binding subunit              | -3.1       | -2.1        |
| <b>RpoN</b> | <b>PA0652</b> | <b><i>vfr</i>, transcriptional regulator</b>     | <b>---</b> | <b>-1.5</b> |
| Vfr         | PA4552        | <i>pilW</i> , type 4 fimbrial biogenesis protein | ---        | -1.7        |
